# Supplementary material
Source: PubMed Central journal article supplement (PMC2528116)
Supplement: pp.108.123778_1.pdf [file pp.108.123778_1.pdf]

Trx s1: genomic sequence with an intron of 108 bp

**ATG**ACTACCGTCACAATAACAATGTCTTCCTTCATCTTTATAATACTTTTTTCACACTCTTTCAGCATCCATGGCC  
ACCGCACAACCTCCTCAACGCTGCCACTCAAGATGCTTCCAATGGAGGTTTGGTTTTAATTATTAACCTAATATTT  
GTGGTTGAGATTTTGTGTTTTTATTTGTTTGCATACGAAGTGGCAATTGTATCAGGATTTTTGTTTTAAATATT  
GCAGTGGCTTATGTTACCGATGAAAATTTTGGTTCCTTGCCTTAACTCTGAGACTCTTGTGTTGGTGAATTC  
TTCGCTCCATTGTGTAGCCCCTGCAAGAATGTTGATTTCAAATAGTTGAGCTGGCAAATGAATATGCAGGTGAG  
GTCGAGTTTTTCAAACCTCAATGTTGATGACAATCAACTTATTCTTCTAAATATGGGATTAAGGTATTCCAAAT  
GTCCTTATCTTCAAAAATGGTGAACAAAGAGATACACTTTTTTGGTAACTTACCCAAGGCAACGTTTATCAAACGT  
ATGGAACAAAACCTA**TGA**

Trx s1: coding region

**ATG**ACTACCGTCACAATAACAATGTCTTCCTTCATCTTTATAATACTTTTTTCACACTCTTTCAGCATCCATGGCC  
ACCGCACAACCTCCTCAACGCTGCCACTCAAGATGCTTCCAATGGAGTGGCTTATGTTACCGATGAAAAATTTGGT  
TCCCTTGTCTTAACTCTGAGACTCTTGTGTTGGTGAATTCCTTCGCTCCATTGTGTAGCCCCTGCAAGAATGTT  
GATTTCAAATAGTTGAGCTGGCAAATGAATATGCAGGTGAGGTGAGTTCGAGTTTTTCAAACCTCAATGTTGATGACAAT  
CAACTTATTCTTCTAAATATGGGATTAAGGTATTCCAAATGTCTTATCTTCAAAAATGGTGAACAAAGAGAT  
ACACTTTTTGGTAACTTACCCAAGGCAACGTTTATCAAACGTATGGAACAAAACCTA**TGA**

Trx s1: protein sequence

**MTTVTITMSSFIFIIILFHTLSASMATA**QLLNAATQDASNGVAYVTDENFGSLVLNSETLVLVEFFAPLCSCKNV  
DFKIVELANEYAGEVEFFKLNVDNQLIPSKYGIKIPNVLIFKNGEQRDTLFGNLPKATFIKRMEQNL

Trx s2: genomic sequence with an intron of 146 bp

**ATG**GCCACCGTCACATTAGCAATGTCTTCCTTCATCATTTTAATACTTTTTTCACACTCTTTCGTCATCCATGGCC  
ACCGTACAACCTCGAATCCTTACCAAGTTACCTCCTCAGTGCCGCCGATGCTTCCGATGGAGGTTTGGTTTTAATT  
ATTAACCCAATATTTGTATTTTTTTCGTTTGCAGACGAAGTGAACAAGCACCACAATATTTCTGTTTTAGATTTGAT  
AAAAAATGAGTTAGTGCCAGGTTAATAAAAACCTTTGATGTTATTATTTCGATATTGTAGTGGCTCCTGTTACTGATG  
AACTTTTTGGTTCCTTCGTCCTATGTCTAAGAATCTCGTGTGGTGGGAATTCCTATAATCCATGGTGTGGCCAAA  
ACTGCAAAAACATACATTCCATAATGGTTGAGCTGGCAAATGATTATGCTGGTAAGGTCGATTTTTTACAACTCA  
ATATTGATGAGAATCCATATATTACTAATAGATATGTGATTCAAGATCTTCCAACCTGTGGTTTTTCATCAAGTATG  
GTATGCAGAGAGATAGACTTGTGGTGTATGACCTAAAGCAACATTTATCGAACTTATTCAACTATCAATA**TGAA**  
CCGGGCTTCTCCTCAAGGGCGAATTCGTTTAAACCTGCAGGACTAGTCCCTTTAGTGAGGGTTAATTTCTGAGCTT  
GGCGTAATCATGGTCATAGCTGTTTCTGTGTGAAATTGTTATCCGCTCACAATTCACACAACATACGAGCCGG  
AAGCATAAAGTGTAAGCCTGGGGTGCCTAAATGAGTGAGCTAACTCACATTAATTGCGTTGCGCTCA

Trx s2: coding region

**ATG**GCCACCGTCACATTAGCAATGTCTTCCTTCATCATTTTAATACTTTTTTCACACTCTTTCGTCATCCATGGCC  
ACCGTACAACCTCGAATCCTTACCAAGTTACCTCCTCAGTGCCGCCGATGCTTCCGATGGAGTGGCTCCTGTTACT  
GATGAAACTTTTTGGTTCCTTCGTCCTATGTCTAAGAATCTCGTGTGGTGGGAATTCCTATAATCCATGGTGTGGC  
CAAACTGCAAAAACATACATTCCATAATGGTTGAGCTGGCAAATGATTATGCTGGTAAGGTCGATTTTTTACAAA  
CTCAATATTGATGAGAATCCATATATTACTAATAGATATGTGATTCAAGATCTTCCAACCTGTGGTTTTTCATCAAG  
TATGGTATGCAGAGAGATAGACTTGTGGTGTATGACCTAAAGCAACATTTATCGAACTTATTCAACTATCAATA  
**TGA**

Trx s2: protein sequence

**MATVTLAMSSFIILILFHTLSSSMATV**QLESLPSYLLSAADASDGVAPVTDETFSGSFVPMKSNLVLVEFYNPWCG  
QNCKNIHSIMVELANDYAGKVDFYKLNIDENPYITNRYVIQDLPTVVF IKYGMQRDLVGDVDPKATFIELIQLSI

**Supplemental Fig. 1.** Genomic sequences and coding regions of *Trxs s* cloned from *M. truncatula*. Start and stop codons are indicated in red. Both isoforms of *Trxs s* have only one intron (in grey) in the coding region of their genes that separates the parts coding the putative signal peptide and the rest of the protein. The deduced protein sequences are also shown; the signal peptides that are removed in the mature proteins appear in bold.
