# Supplementary material
Source: PubMed Central journal article supplement (PMC2528116)

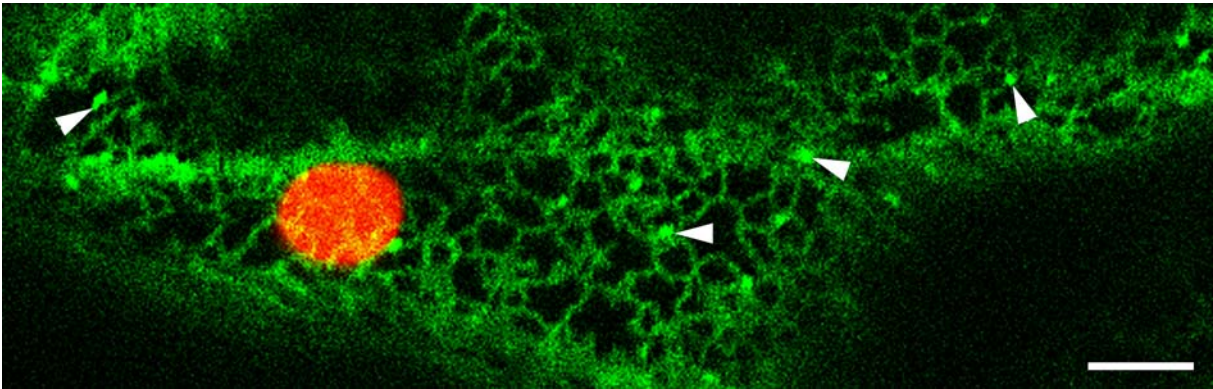

Supplement: pp.108.123778_2.pdf [file pp.108.123778_2.pdf]
